# Supplementary material for: Metabolomics-based non-targeted screening analysis of 34 PPCPs in bovine and piscine muscles
Source: Royal Society of Chemistry journal article supplement (doi:10.1039/d1ay01576a), 2021-12-01
Supplement: d1ay01576a1.pdf [file d1ay01576a1.pdf]

## Supplementary Information

### Metabolomics-based Non-targeted Screening Analysis of 34 PPCPs in Bovine and Piscine Muscles<sup>†</sup>

Weifeng Xue,<sup>\*a</sup> Haiqin Zhang,<sup>b</sup> Mei Wang,<sup>a</sup> Ying Liu,<sup>a</sup> Mengyao Liu<sup>a</sup> and Baozhen Shen<sup>a</sup>

<sup>a</sup>Technical Center of Dalian Customs, Dalian 116000, China.

<sup>b</sup>School of Environmental Science and Engineering, Liaoning Technical University, Fuxin 123000, China.

\*Corresponding author, E-mail: xwf526@163.com.

<sup>†</sup>The first two authors contributed equally to this work.

3 Pages, 4 Figures, 3 Tables

|                                                                                   |   |
|-----------------------------------------------------------------------------------|---|
| Fig. S1 PCA score plots of spiked piscine muscle sample groups.....               | 2 |
| Fig. S2 OPLS-DA score plots of spiked piscine muscle sample groups.....           | 2 |
| Fig. S3 S-plot plots of spiked piscine muscle sample groups.....                  | 2 |
| Fig. S4 Permutation plots of spiked piscine muscle sample groups.....             | 2 |
| Table S1 Recovery of spiked ciprofloxacin-d8 in bovine muscle sample groups.....  | 3 |
| Table S2 Recovery of spiked ciprofloxacin-d8 in piscine muscle sample groups..... | 3 |
| Table S3 Marker compounds screened in piscine muscle sample groups.....           | 3 |

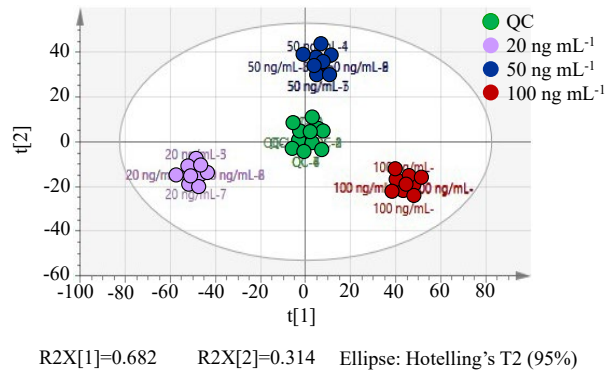

Fig. S1 PCA score plots of spiked piscine muscle sample groups.

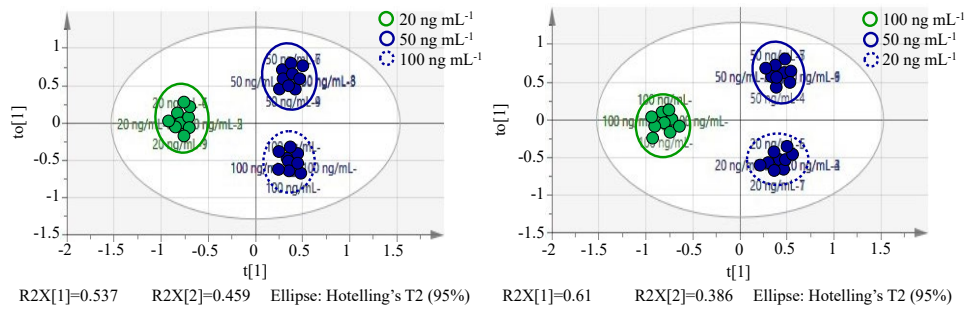

Fig. S2 OPLS-DA score plots of spiked piscine muscle sample groups.

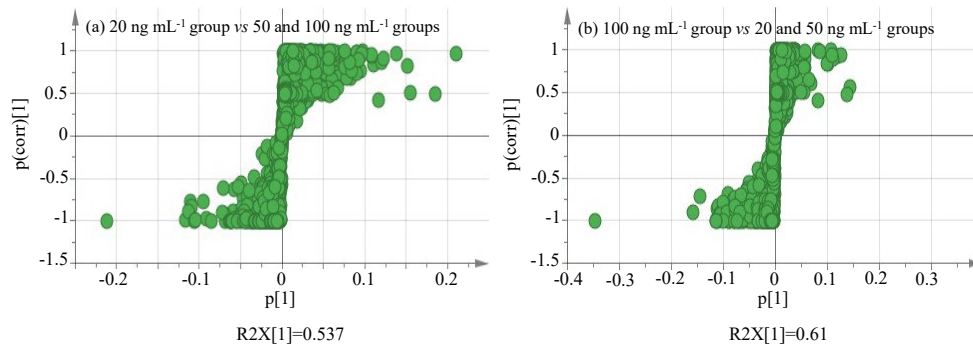

Fig. S3 S-plot plots of spiked piscine muscle sample groups.

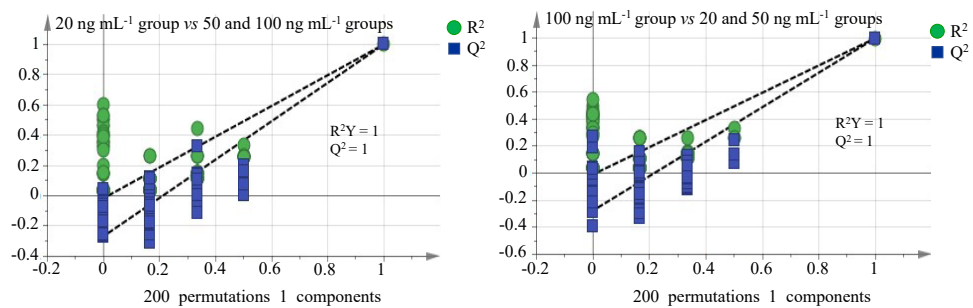

Fig. S4 Permutation plots of spiked piscine muscle sample groups.

**Table S1** Recovery (%) of spiked ciprofloxacin-d8 in bovine muscle sample groups (n=9)

| Concentration groups (ng·mL <sup>-1</sup> ) | 1    | 2    | 3    | 4    | 5    | 6    | 7    | 8    | 9    | RSD (%) |
|---------------------------------------------|------|------|------|------|------|------|------|------|------|---------|
| 20                                          | 90.1 | 83.3 | 87.6 | 84.8 | 89.1 | 84.5 | 88.7 | 92.1 | 92.1 | 3.7     |
| 50                                          | 89.2 | 83.4 | 91.7 | 88.4 | 82.2 | 90.0 | 87.4 | 82.5 | 83.6 | 4.2     |
| 100                                         | 81.9 | 73.4 | 78.2 | 74.0 | 82.3 | 76.5 | 77.2 | 77.5 | 78.9 | 3.9     |

**Table S2** Recovery (%) of spiked ciprofloxacin-d8 in piscine muscle sample groups (n=9)

| Concentration groups (ng·mL <sup>-1</sup> ) | 1    | 2    | 3    | 4    | 5    | 6    | 7    | 8    | 9    | RSD (%) |
|---------------------------------------------|------|------|------|------|------|------|------|------|------|---------|
| 20                                          | 93.7 | 88.4 | 92.1 | 90.8 | 87.4 | 87.9 | 86.4 | 89.0 | 92.7 | 2.9     |
| 50                                          | 87.4 | 85.6 | 88.0 | 87.3 | 82.9 | 84.3 | 81.2 | 82.1 | 80.5 | 3.4     |
| 100                                         | 78.4 | 73.1 | 73.1 | 74.2 | 77.5 | 72.0 | 80.5 | 83.2 | 81.3 | 5.3     |

**Table S3** Marker compounds screened in piscine muscle sample groups

| Var ID<br>(Primary) | Marker<br>compounds                    | VIP<br>Pred <sup>a</sup> | Coordinate<br>in S-plot <sup>b</sup> | Mass error<br>(ppm) <sup>c</sup> | LOD<br>(µg kg <sup>-1</sup> ) |
|---------------------|----------------------------------------|--------------------------|--------------------------------------|----------------------------------|-------------------------------|
| M260T571            | Propranolol                            | 3.784/4.646              | (-0.099, -0.905)/(0.122, 0.904)      | 0.617                            | 0.6                           |
| M234T261            | Cimbuterol                             | 3.089/4.111              | (-0.081, -0.906)/(0.108, 0.944)      | -2.061                           | 0.5                           |
| M228T491            | Tolobuterol                            | 4.030/3.586              | (-0.106, -0.917)/(0.094, 0.902)      | -0.294                           | 0.5                           |
| M214T418            | Clorprenaline                          | 3.379/3.281              | (-0.089, -0.903)/(0.086, 0.904)      | -0.225                           | 0.7                           |
| M226T148            | Terbutaline                            | 2.259/2.612              | (-0.059, -0.916)/(0.069, 0.917)      | -1.751                           | 0.6                           |
| M310T388            | Nadolol                                | 3.816/2.034              | (-0.100, -1.000)/(0.053, 0.901)      | -2.351                           | 0.6                           |
| M273T138            | Sotalol                                | 1.722/1.660              | (-0.019, -0.904)/(0.044, 0.979)      | 0.563                            | 0.7                           |
| M170T467            | Iprnidazole                            | 4.059/4.221              | (-0.107, -0.927)/(0.111, 0.936)      | 2.920                            | 0.7                           |
| M202T352            | Thiabendazole                          | 4.158/4.573              | (-0.109, -0.934)/(0.120, 0.931)      | -1.654                           | 1.6                           |
| M248T296            | Tinidazole                             | 2.740/3.588              | (-0.072, -0.965)/(0.094, 0.939)      | -2.146                           | 1.9                           |
| M266T626            | Albendazole                            | 4.029/3.441              | (-0.106, -0.924)/(0.090, 0.940)      | 0.143                            | 1.9                           |
| M300T661            | Fenbendazole                           | 2.926/3.121              | (-0.077, -0.965)/(0.082, 0.965)      | -0.272                           | 0.6                           |
| M188T101            | Metronidazole-<br>hydroxy              | 1.943/2.638              | (-0.051, -0.944)/(0.069, 0.947)      | -0.353                           | 0.5                           |
| M172T152            | Metronidazole                          | 2.721/2.833              | (-0.072, -0.975)/(0.074, 0.954)      | 2.916                            | 0.8                           |
| M220T383            | Ornidazole                             | 3.301/1.854              | (-0.087, -0.999)/(0.049, 0.926)      | -1.476                           | 0.6                           |
| M162T266            | 5-Chloro-1-methyl<br>-4-nitroimidazole | 1.673/1.654              | (-0.044, -0.984)/(0.043, 0.920)      | -0.394                           | 0.6                           |
| M201T177            | Ronidazole                             | 1.815/1.657              | (-0.048, -0.913)/(0.044, 0.912)      | -1.134                           | 0.4                           |
| M393T500            | Sparfloxacin                           | 1.622/2.866              | (-0.043, -0.907)/(0.075, 0.990)      | -3.455                           | 1.0                           |
| M400T446            | Difloxacin                             | 1.211/2.178              | (-0.032, -0.909)/(0.057, 0.994)      | -2.715                           | 0.4                           |
| M262T553            | Oxolinic acid                          | 1.986/2.371              | (-0.052, -0.910)/(0.062, 0.907)      | 4.435                            | 2.0                           |
| M263T524            | Cinoxacin                              | 2.282/2.133              | (-0.060, -0.913)/(0.056, 0.901)      | 2.106                            | 0.8                           |
| M287T661            | Boldenone                              | 1.660/2.248              | (-0.044, -0.905)/(0.059, 0.946)      | -0.921                           | 0.7                           |
| M345T738            | Testosterone<br>propionate             | 2.480/1.559              | (-0.065, -0.999)/(0.037, 0.929)      | 0.122                            | 1.7                           |
| M271T659            | Trenbolone                             | 2.684/1.422              | (-0.071, -1.000)/(0.037, 0.907)      | 1.869                            | 1.7                           |
| M442T663            | Deflazacort                            | 1.162/1.355              | (-0.031, -0.909)/(0.036, 0.914)      | -4.677                           | 0.5                           |
| M250T278            | Sulfapyridine                          | 2.966/4.113              | (-0.078, -0.934)/(0.108, 0.954)      | -0.686                           | 0.4                           |
| M279T374            | Sulfisomidine                          | 2.508/3.661              | (-0.066, -0.905)/(0.096, 0.966)      | -3.077                           | 2.0                           |
| M265T304            | Sulfamerazine                          | 2.159/3.446              | (-0.057, -0.905)/(0.091, 0.980)      | -2.799                           | 2.1                           |
| M279T222            | Sulfmethazine                          | 3.532/3.200              | (-0.093, -0.906)/(0.084, 0.909)      | -4.681                           | 1.8                           |
| M277T482            | Sulfabenzamide                         | 1.632/2.354              | (-0.043, -0.909)/(0.062, 0.959)      | 2.561                            | 1.8                           |
| M251T200            | Sulfadiazine                           | 1.897/1.917              | (-0.050, -0.902)/(0.050, 0.935)      | 0.422                            | 0.3                           |
| M285T407            | Sulfachloropyridazine                  | 1.362/1.475              | (-0.036, -0.902)/(0.039, 0.916)      | -2.350                           | 2.1                           |
| M215T120            | Sulphacetamide                         | 1.368/1.222              | (-0.036, -0.902)/(0.032, 0.915)      | 4.277                            | 0.6                           |
| M271T366            | Sulfamethizole                         | 2.293/1.222              | (-0.060, -1.000)/(0.032, 0.901)      | -2.372                           | 0.8                           |

<sup>a</sup> two VIP values from 100 and 20 ng mL<sup>-1</sup> groups, respectively; <sup>b</sup> two-group coordinate values from 100 and 20 ng mL<sup>-1</sup> groups, respectively; <sup>c</sup> Mass error (ppm) = (extracted molecular weight from W4M platform - extracted molecular weight from LC-MS/MS)\*10<sup>6</sup>/extracted molecular weight from LC-MS/MS.
